# Supplementary material
Source: PubMed Central journal article supplement (PMC4922686)
Supplement: JCI85033.sd.pdf [file JCI85033.sd.pdf]

**Table S1. List of primer sequences:**

| Gene    | Forward (5'-3')       | Reverse (5'-3')        |
|---------|-----------------------|------------------------|
| M1-AChR | GCTCAAAGTGGGTGCCCTTG  | GGAGGGAGGAAGGGAAAGAGAG |
| M2-AChR | CATGCCTGGTGGTGATGGTG  | GGCCCAGGGAAGTGGAAAC    |
| M3-AChR | TTATGAACCGCTGGGCTCTG  | AATCATCACACCGGCTCGTT   |
| M4-AChR | GCTAGTTCCGCCGTCTGTCC  | CAGGTGGTTGTGGGCTGTTG   |
| M5-AChR | GCATGGCTGGTCTCCTTCATC | CCCGGTAGATCCGGCAGTAG   |

**Figure S1. pM1shRNA enables Cre-dependent knockdown of M1-AChR, but did not influence mRNA levels of other mAChRs**

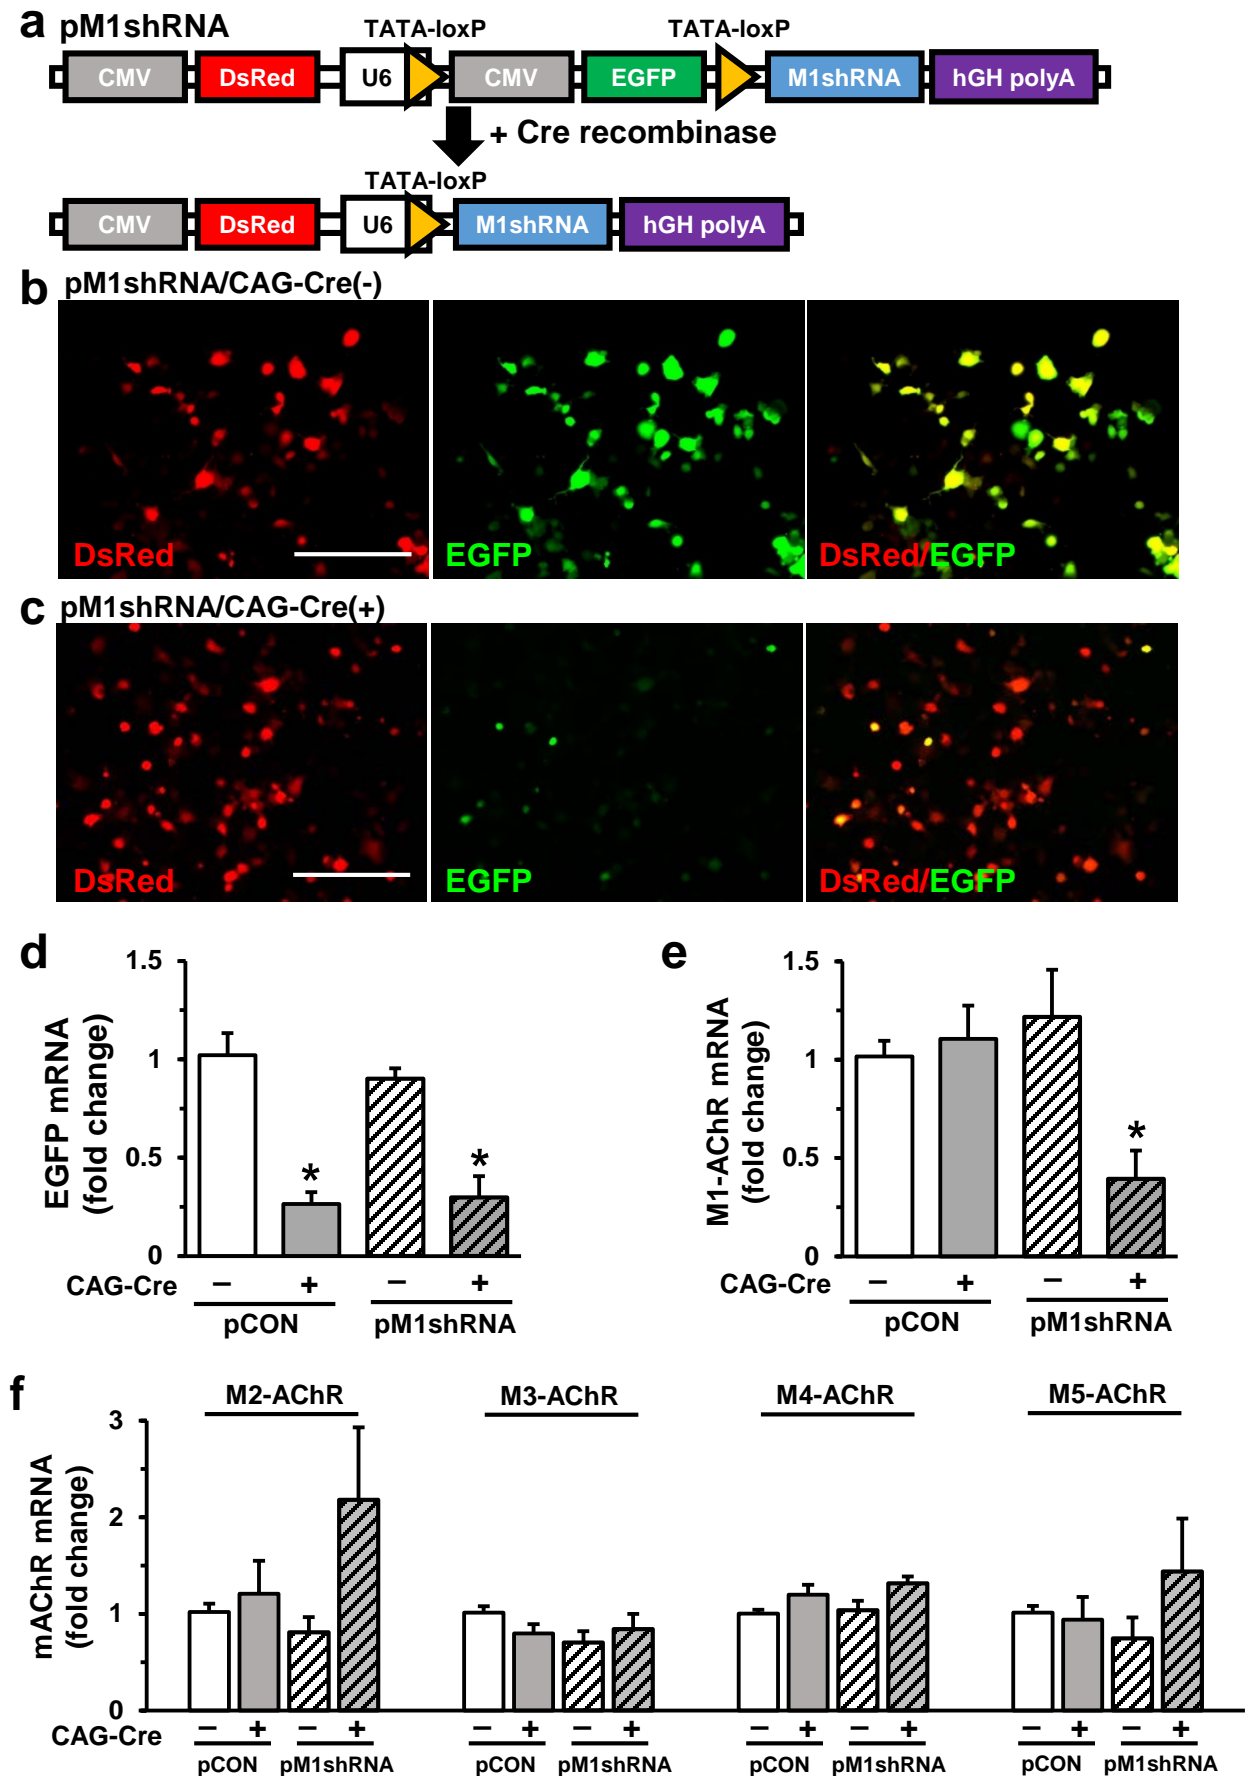

**Figure S2. M1-AChR knockdown in CaMKII<sup>CRE</sup> and SST<sup>CRE</sup> mice in a neuron-specific manner.**

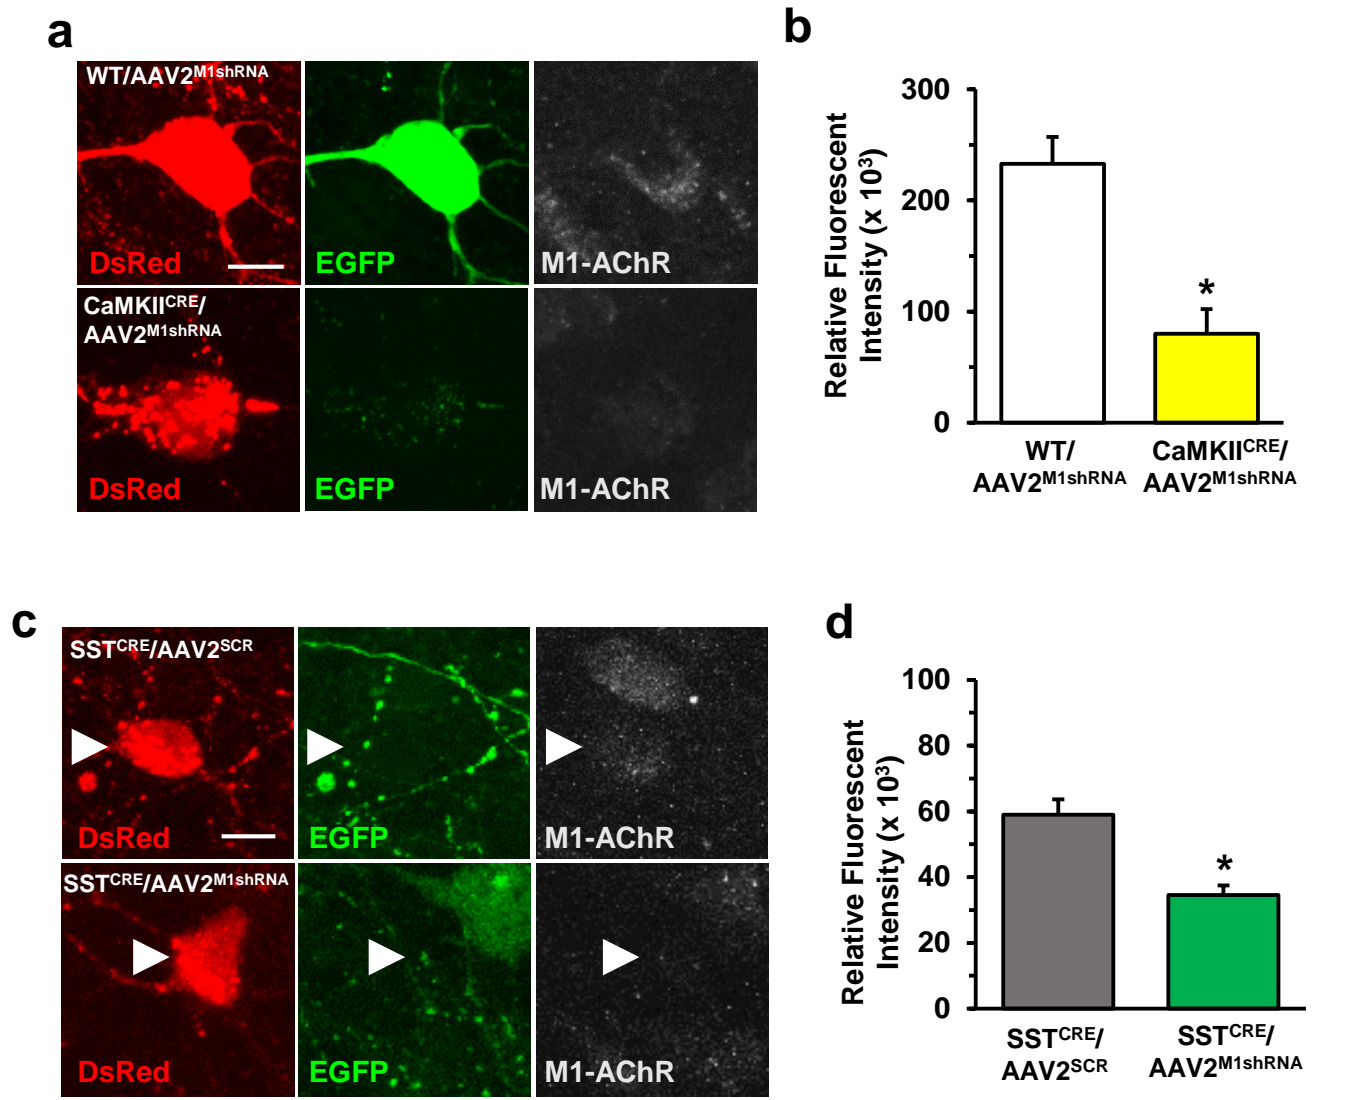

Figure S3. M1-AChR knockdown in CaMKII<sup>CRE</sup> mice did not affect FosB activation following scopolamine treatment.

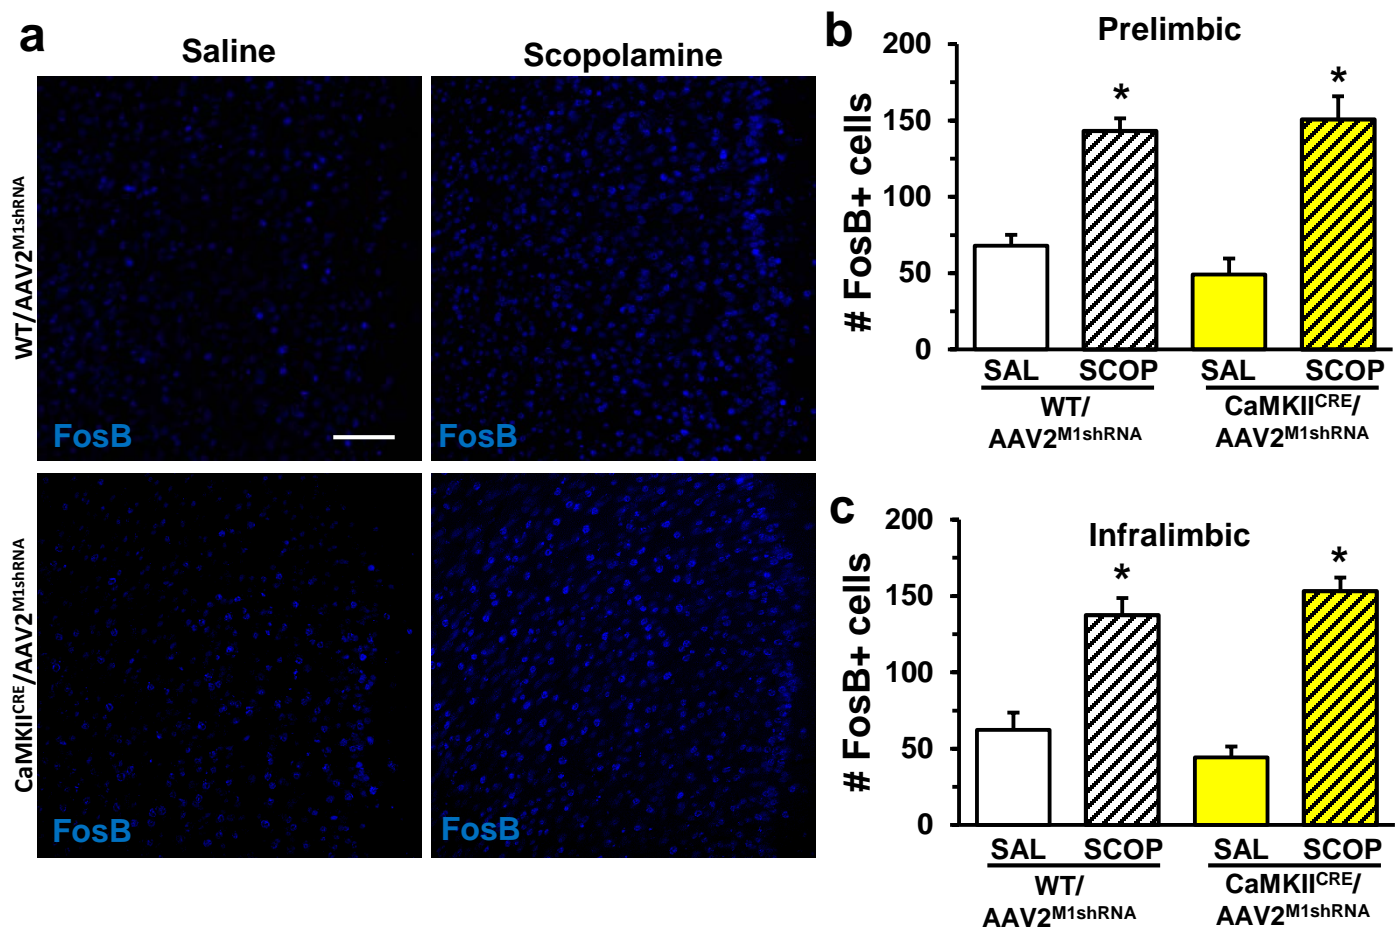

**Figure S4. Somatostatin and parvalbumin interneurons have varied distribution in the mPFC.**

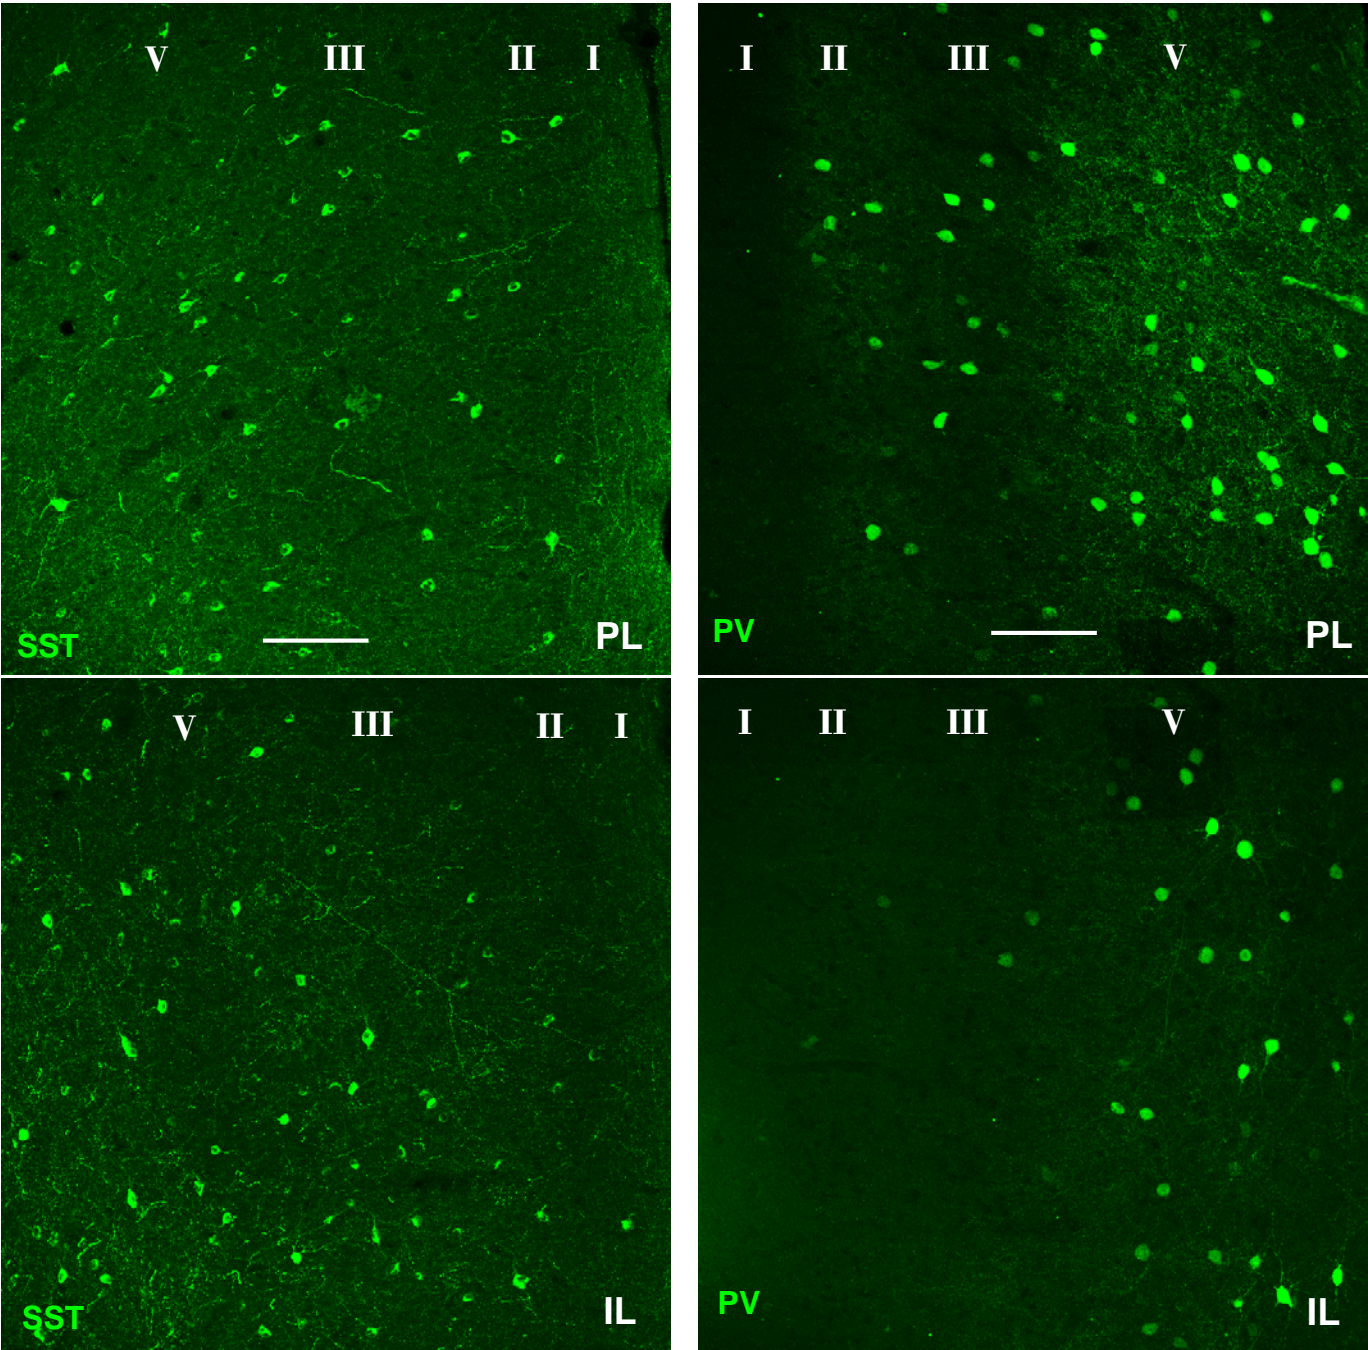

**Figure S5. AAV2<sup>M1shRNA</sup> infusion in the mPFC of SST<sup>CRE</sup> or PV<sup>CRE</sup> mice did not influence baseline behavior.**

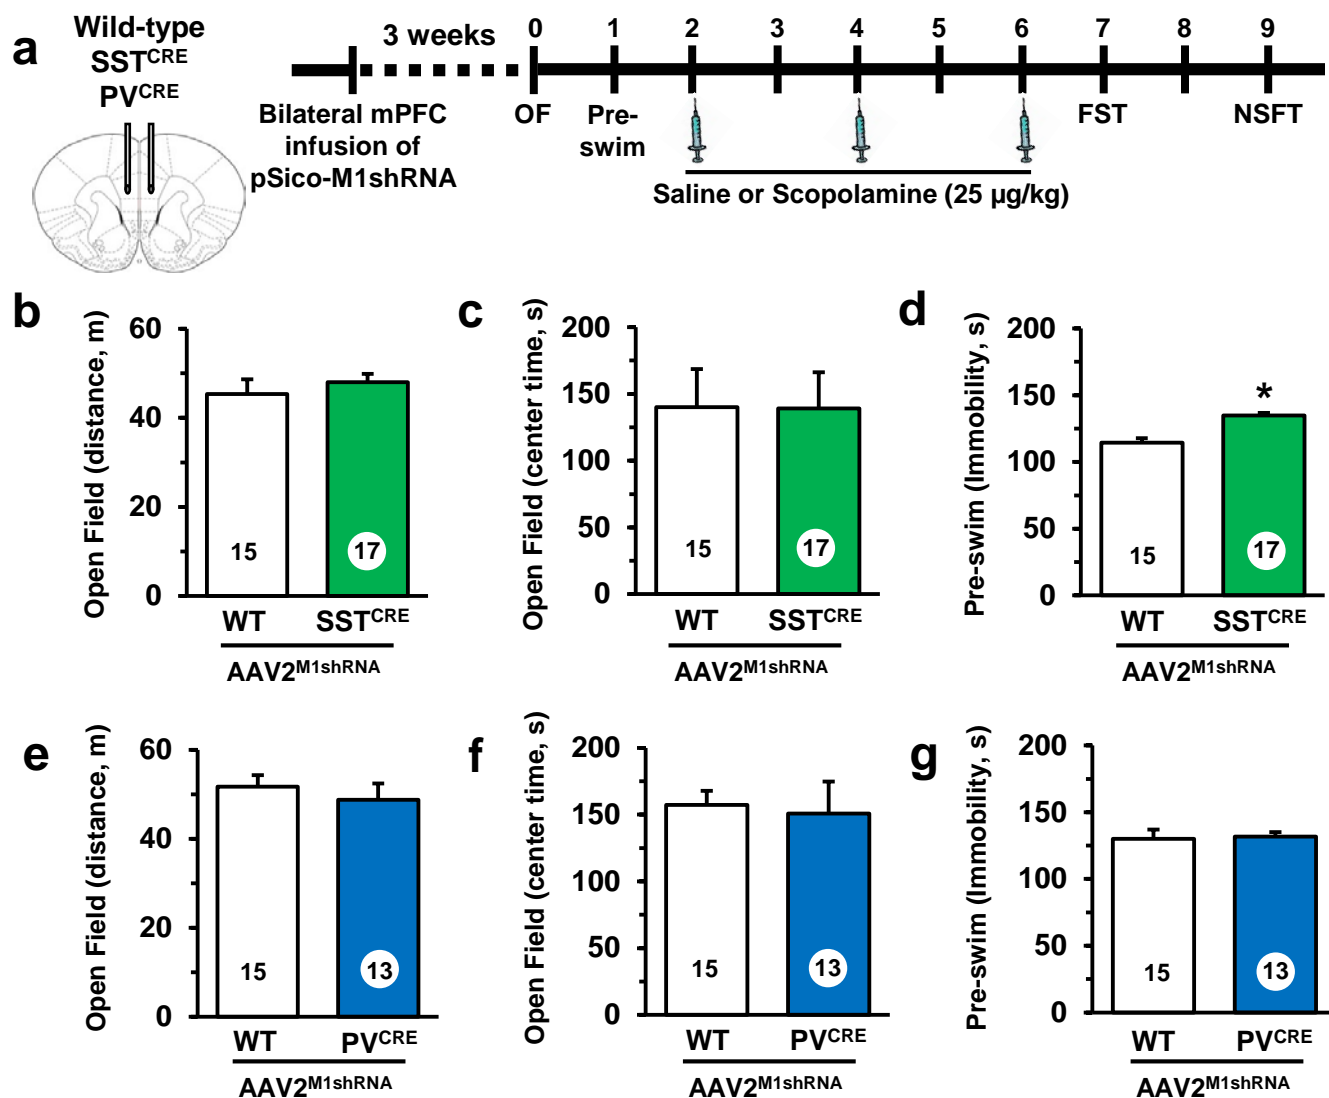

**Figure S6. AAV2<sup>M1shRNA</sup>, but not AAV2<sup>SCR</sup>, infusion in the mPFC of SST<sup>CRE</sup> mice blocked scopolamine antidepressant-like effects in NSFT.**

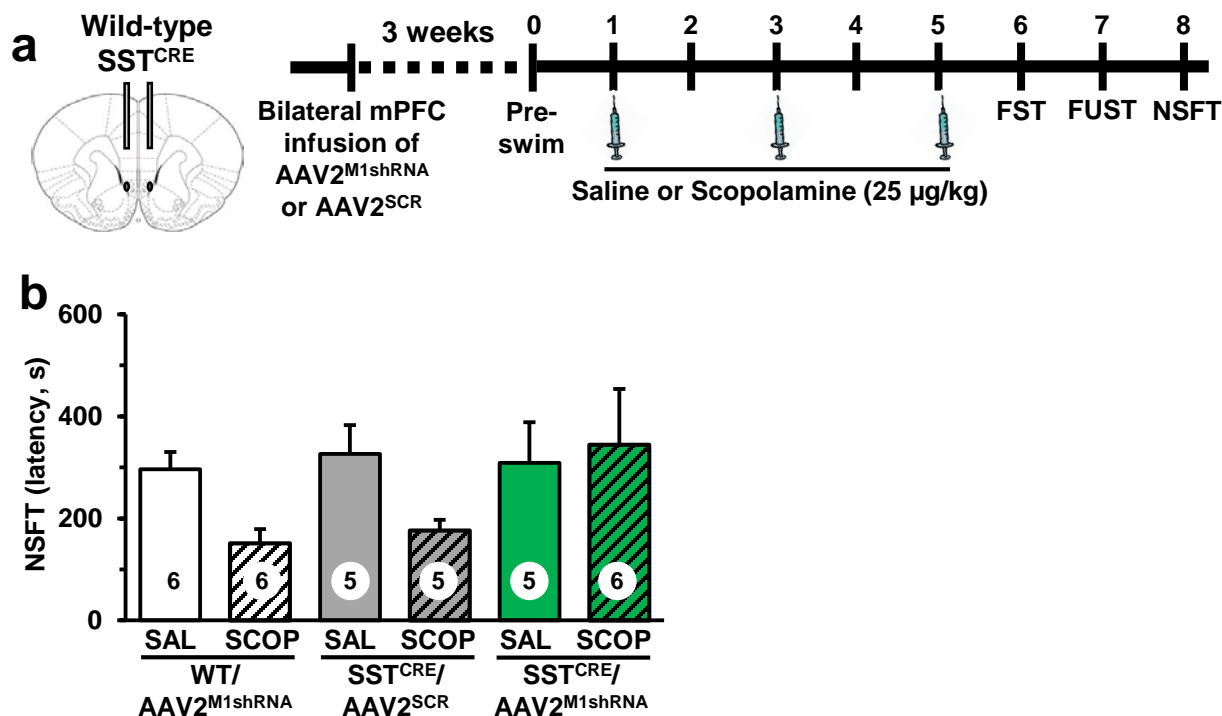

## Supplemental Figure Legends:

### Table S1. List of primer sequences.

**Figure S1. pM1shRNA enables Cre-dependent knockdown of M1-AChR, but did not influence mRNA levels of other mAChRs.** **a)** Layout of pM1shRNA construct and Cre-induced recombination enabling U6 driven expression of M1shRNA. **b)** Representative images of N2a transfection with pM1shRNA alone (no CAG-Cre) showing expression of DsRed and EGFP expression. **c)** Representative images of N2a co-transfection with pM1shRNA and CAG-Cre showing DsRed expression and limited EGFP after recombination. Relative gene expression of EGFP **(d)**, M1-AChR **(e)**, and other mAChRs **(f)** in transfected N2a cultures.

**Figure S2. M1-AChR knockdown in CaMKII<sup>CRE</sup> and SST<sup>CRE</sup> mice in a neuron-specific manner.** **a)** Representative images of DsRed, EGFP, and M1-AChR in pyramidal neurons from wild-type (WT) or CaMKII<sup>CRE</sup> mice infused with AAV2<sup>M1shRNA</sup>. **b)** Quantification of M1-AChR relative fluorescent intensity in WT and CaMKII<sup>CRE</sup> mice. **c)** Representative images of DsRed, EGFP, and M1-AChR in recombined interneurons from SST<sup>CRE</sup> mice infused with AAV2<sup>SCR</sup> or AAV2<sup>M1shRNA</sup>. **d)** Quantification of M1-AChR relative fluorescent intensity in SST<sup>CRE</sup> mice. Means that are significantly different than respective control group based on *T*-test are noted by (\*,  $p < 0.05$ ).

**Figure S3. M1-AChR knockdown in CaMKII<sup>CRE</sup> mice did not affect FosB activation following scopolamine treatment.** **a)** Representative images of FosB immunolabeling in the prelimbic mPFC of wild-type (WT) or CaMKII<sup>CRE</sup> mice infused with AAV2<sup>M1shRNA</sup> and treated with saline or scopolamine. White scale bar represents 100  $\mu$ m. Quantification of FosB+ cells in the prelimbic **(b)** and infralimbic **(c)** mPFC. Means that are significantly different than respective saline group based on ANOVA are noted by (\*,  $p < 0.05$ ).

**Figure S4. Somatostatin and parvalbumin interneurons have varied distribution in the mPFC.** Representative images of somatostatin (SST) and parvalbumin (PV) immunolabeling in the prelimbic (PL) and infralimbic (IL) regions of the mPFC. Approximate laminar regions (I-V) are noted. White scale bar represents 100  $\mu$ m.

**Figure S5. AAV2<sup>M1shRNA</sup> infusion in the mPFC of SST<sup>CRE</sup> or PV<sup>CRE</sup> mice did not influence baseline behavior.** As in Fig.7, wild-type (WT) littermates and SST<sup>CRE</sup> or PV<sup>CRE</sup> mice were infused with AAV2<sup>M1shRNA</sup> and treated with saline or scopolamine **(a)**. In SST<sup>CRE</sup> mice baseline open-field distance traveled **(b)**, time in center of open-field **(c)**, and immobility in pre-swim test **(d)** are shown. In PV<sup>CRE</sup> mice baseline open-field distance traveled **(e)**, time in center of open-field **(f)**, and immobility in pre-swim test **(g)** are shown.

**Figure S6. AAV2<sup>M1shRNA</sup>, but not AAV2<sup>SCR</sup>, infusion in the mPFC of SST<sup>CRE</sup> mice attenuated scopolamine antidepressant-like effects in NSFT.** As in Fig.9, wild-type (WT) littermates and SST<sup>CRE</sup> mice were infused with either AAV2<sup>M1shRNA</sup> or scrambled control (AAV2<sup>SCR</sup>) and treated with saline or scopolamine **(a)**. Following saline or scopolamine treatment, latency to feed in the NSFT is shown **(b)**.
